# Supplementary material for: Enabling high loading of well-dispersed Ni2CoP2 catalysts on a 3D-printed electrode for efficient electrocatalysis
Source: Royal Society of Chemistry journal article supplement (doi:10.1039/d3ta02218h), 2023-01-01
Supplement: d3ta02218h1.pdf [file d3ta02218h1.pdf]

Supplementary Material

**Enabling high loading of well-dispersed Ni<sub>2</sub>CoP<sub>2</sub> catalysts on 3D-printed electrode for efficient electrocatalysis**

Meiwen Peng<sup>a</sup>⊥, Bo Zhao<sup>a</sup>⊥, Danli Shi<sup>a</sup>, Yawen Wang<sup>a</sup>, Dong Li<sup>a</sup>, Wenkai Liang<sup>a</sup>, He Yang<sup>a</sup>, Zhiqiang Liang<sup>a</sup>, Yinghui Sun<sup>b\*</sup>, and Lin Jiang<sup>a\*</sup>

<sup>a</sup>Institute of Functional Nano & Soft Materials Laboratory (FUNSOM), Jiangsu Key Laboratory for Carbon-Based Functional Materials & Devices, Soochow University, Suzhou 215123, China

<sup>b</sup>Innovation Center for Chemical Sciences, College of Chemistry, Chemical Engineering and Materials Science, Soochow University, Suzhou, 215123, China

\*Correspondence and requests for materials should be addressed to Lin Jiang (E-mail: [ljiang@suda.edu.cn](mailto:ljiang@suda.edu.cn)) or to Yinghui Sun (E-mail: [yinghuisun@suda.edu.cn](mailto:yinghuisun@suda.edu.cn))

⊥ These authors contributed equally to this work.

## Supplementary Figures

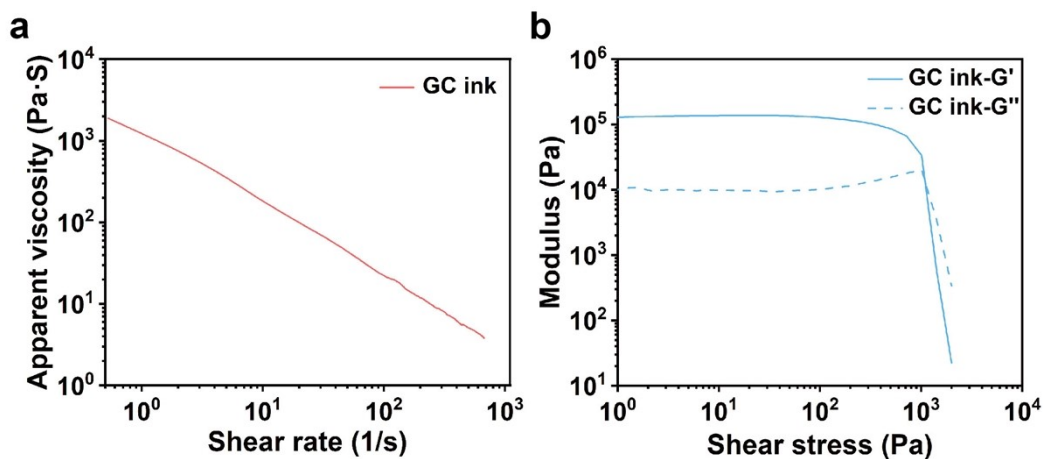

**Fig. S1.** (a) Apparent viscosity as a function of shear rate for GC inks. (b) Storage modulus ( $G'$ ) and loss modulus ( $G''$ ) as a function of shear stress for GC ink.

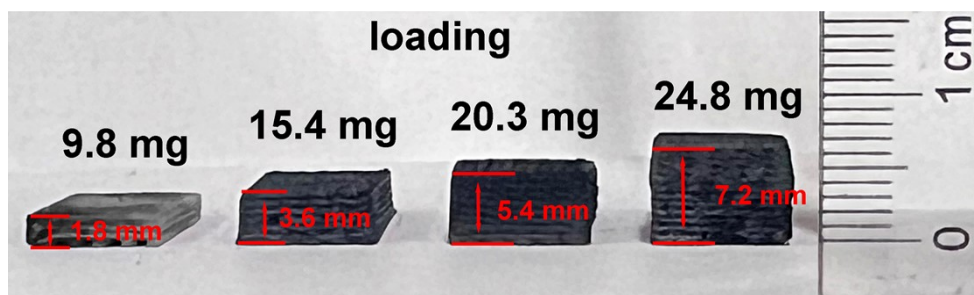

**Fig. S2.** The optical photo of different 3DP GC electrodes with 6, 12, 18, and 24 layers.

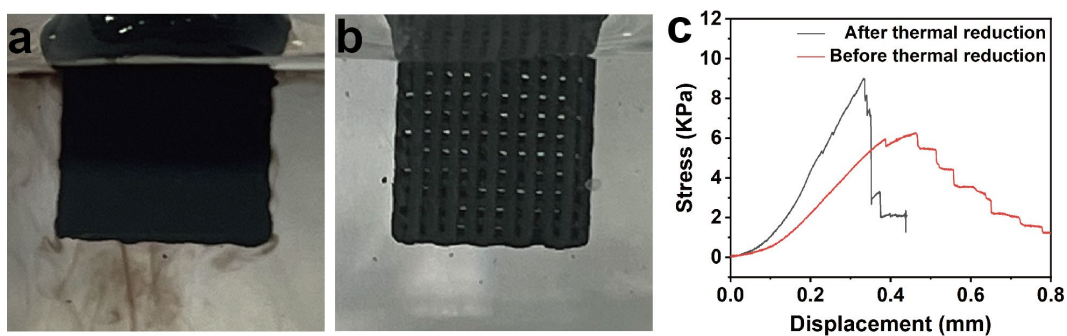

**Fig. S3.** (a) The 3DP GC electrode before thermal reduction, (b) The 3DP GC electrode after thermal reduction, (c) Flexural stress.

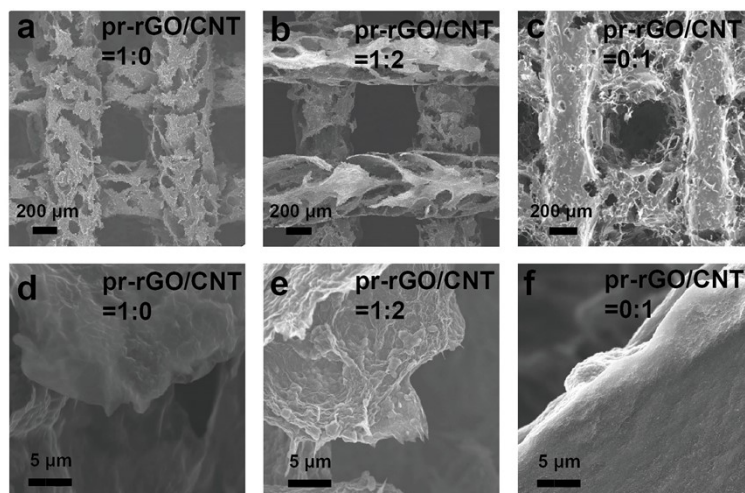

**Fig. S4.** SEM characterization of three electrodes with different GC proportions (a, d) pr-rGO/CNT=1:0, (b, e) pr-rGO/CNT=1:2, (c, f) pr-rGO/CNT=0:1.

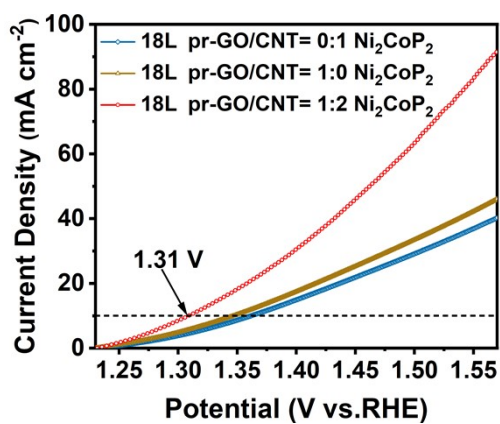

**Fig. S5.** The polarization curves of 18L-3DP electrodes with different ratios of CNT and pr-GO.

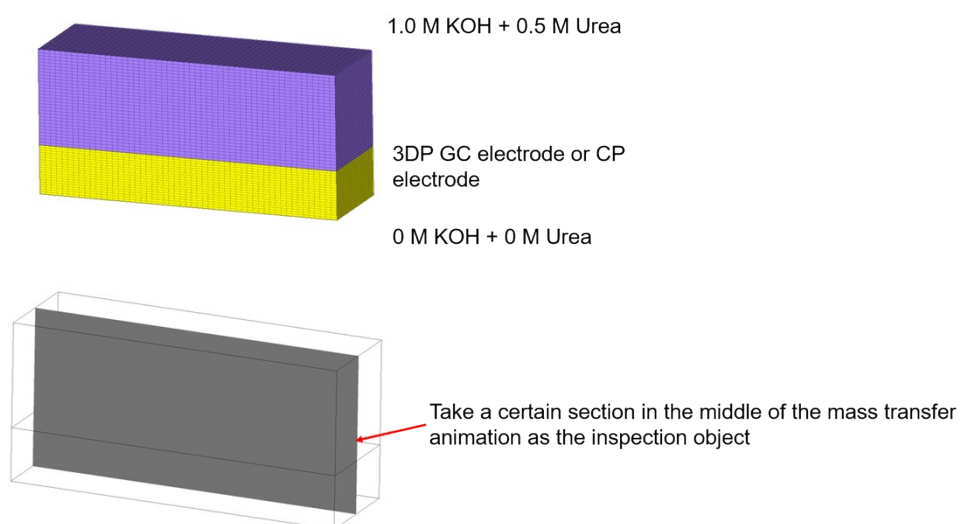

**Fig. S6.** The mass transport model.

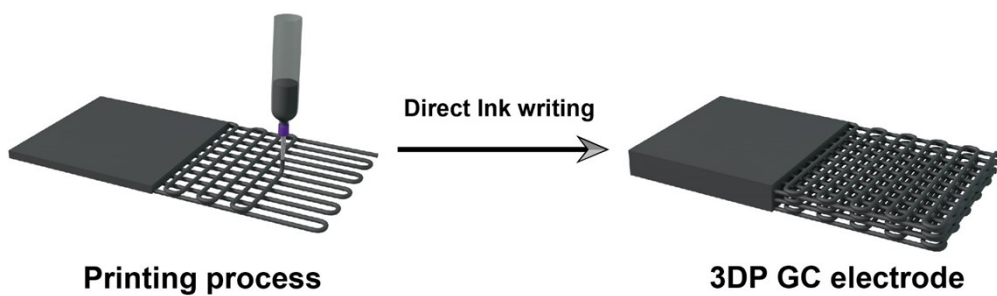

Fig. S7. The printing process of 3DP GC

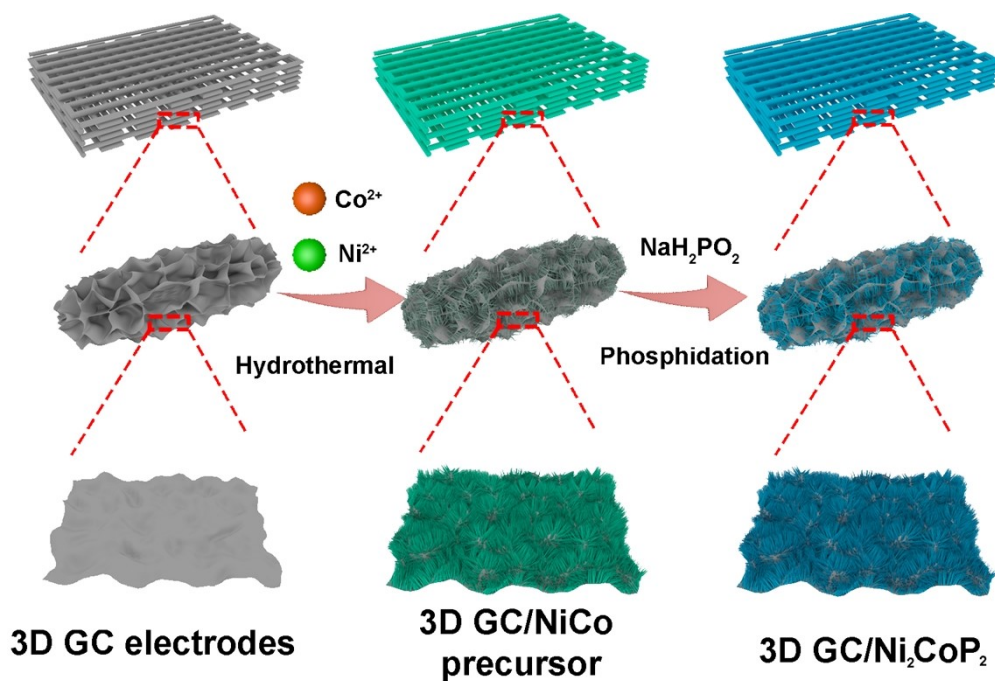

Fig. S8. The preparation of 3DP GC/Ni<sub>2</sub>CoP<sub>2</sub>.

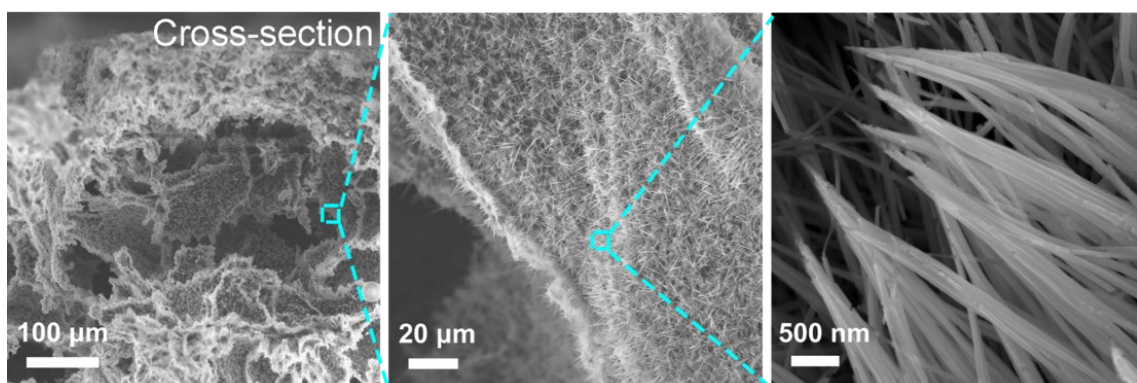

Fig. S9. The SEM images of 3DP GC/Ni<sub>2</sub>CoP<sub>2</sub> (cross-section).

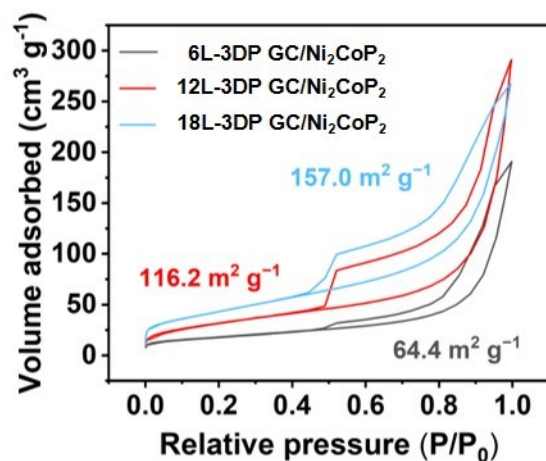

Fig. S10. N<sub>2</sub> sorption isotherm of 6L, 12L, 18L-3DP GC/Ni<sub>2</sub>CoP<sub>2</sub>.

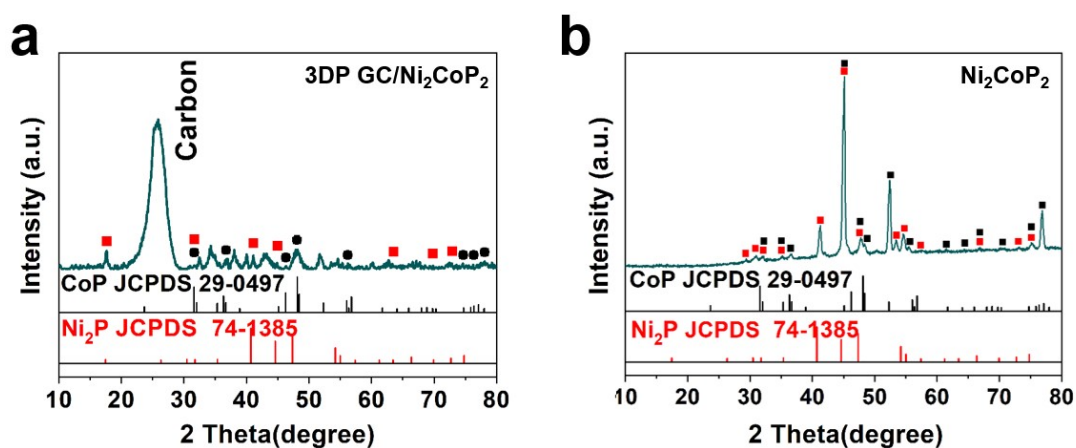

Fig. S11. XRD spectrum of a) 3DP GC/Ni<sub>2</sub>CoP<sub>2</sub>, b) Ni<sub>2</sub>CoP<sub>2</sub>. (red square for Ni<sub>2</sub>P, black square for CoP)

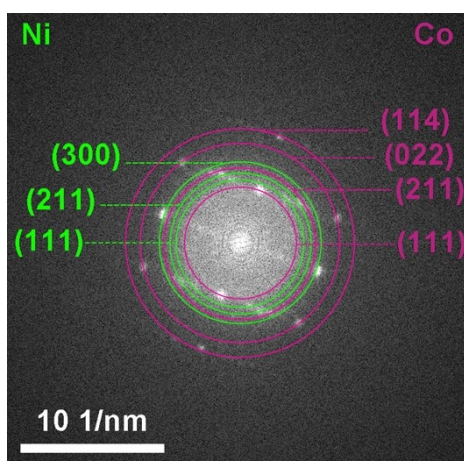

Fig. S12. The SAED pattern of Ni<sub>2</sub>CoP<sub>2</sub>.

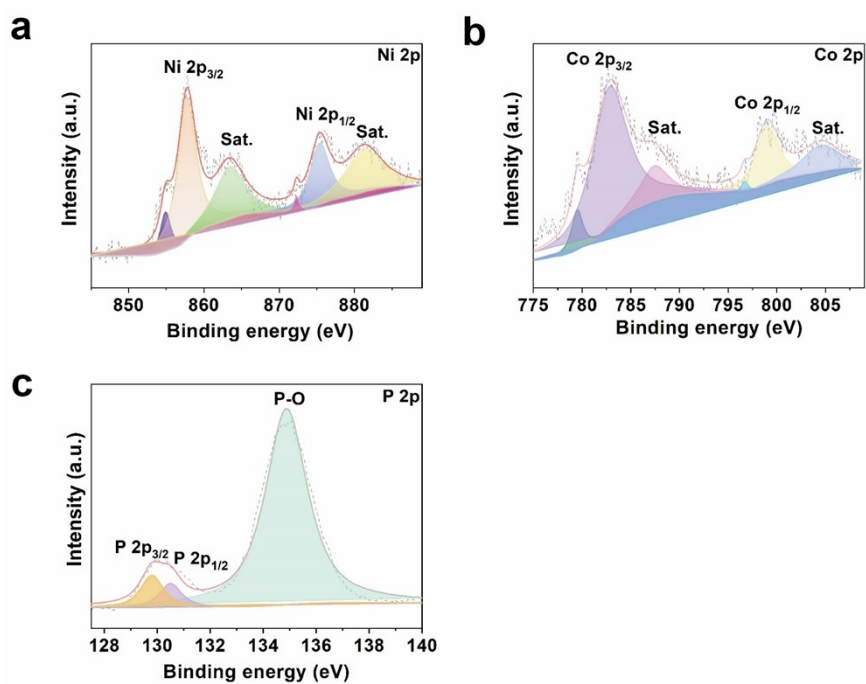

**Fig. S13.** High-resolution XPS spectra of 3DP GC/Ni<sub>2</sub>CoP<sub>2</sub>, a) Ni 2p, b) Co 2p, c) P 2p.

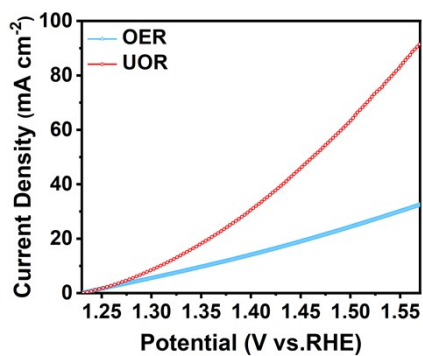

**Fig. S14.** UOR and OER LSV curves of 18L-3DP GC/Ni<sub>2</sub>CoP<sub>2</sub>.

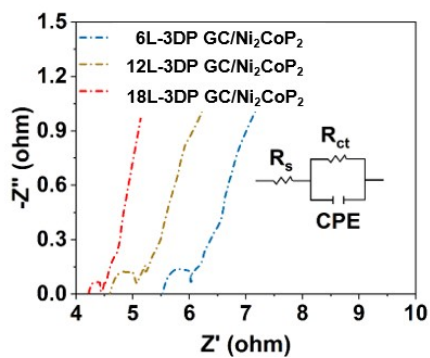

**Fig. S15.** Nyquist plots of different electrocatalysts for UOR.

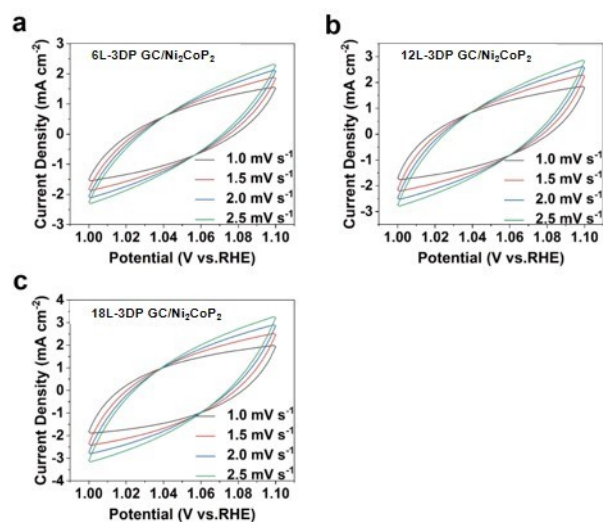

**Fig. S16.** CV curves of 3DP GC/Ni<sub>2</sub>CoP<sub>2</sub> with different layers with different rate from 1 to 2.5 mV s<sup>-1</sup> for UOR.

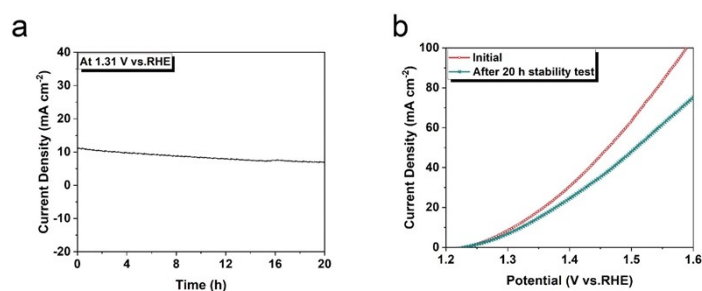

**Fig. S17.** a) Chronopotentiometry plots of 18L-3DP GC/Ni<sub>2</sub>CoP<sub>2</sub> obtained at a constant potential of 1.31 V for UOR. b) LSV curves of 18L-3DP GC/Ni<sub>2</sub>CoP<sub>2</sub> before and after 20 h stability for UOR.

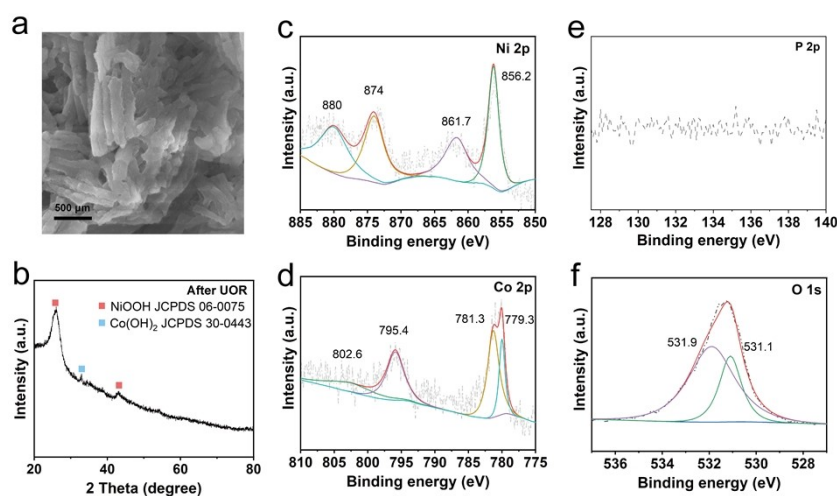

**Fig. S18.** a) The SEM of Ni<sub>2</sub>CoP<sub>2</sub> after UOR, b) The XRD of Ni<sub>2</sub>CoP<sub>2</sub> after UOR, c-f) The XPS of Ni<sub>2</sub>CoP<sub>2</sub> after UOR.

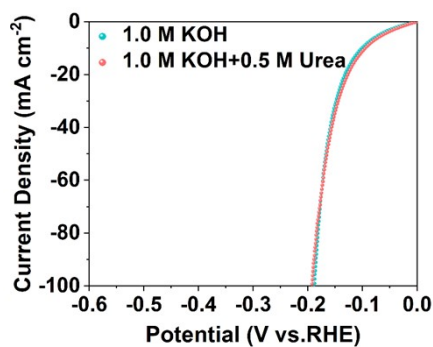

**Fig. S19.** HER LSV curves of 18L-3DP GC/Ni<sub>2</sub>CoP<sub>2</sub> in 1.0 M KOH and 1.0 M KOH with 0.5 M urea.

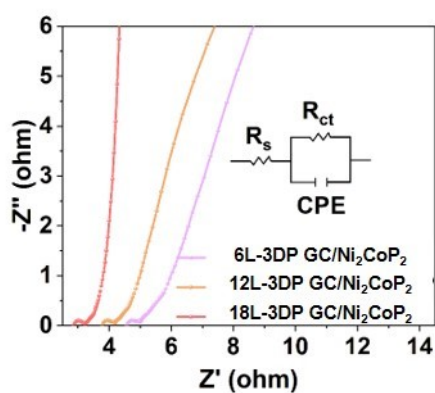

**Fig. S20.** Nyquist plots of different electrocatalysts for the HER.

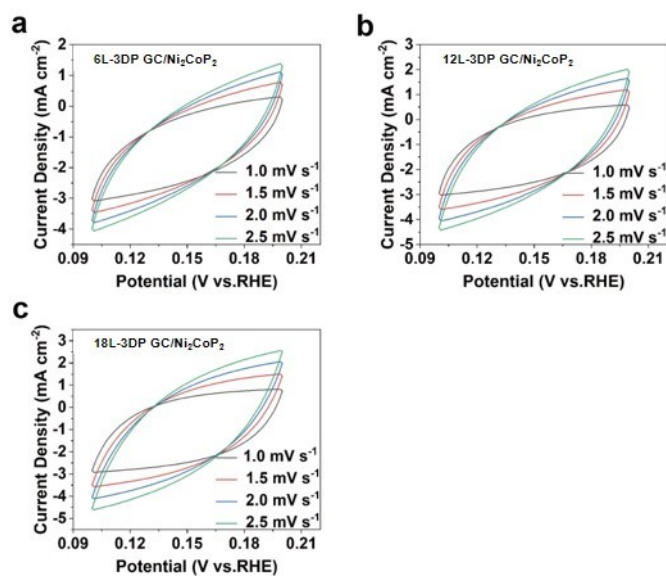

**Fig. S21.** CV curves of 3DP GC/Ni<sub>2</sub>CoP<sub>2</sub> with different layers with different rate from 1 to 2.5 mV s<sup>-1</sup> for HER.



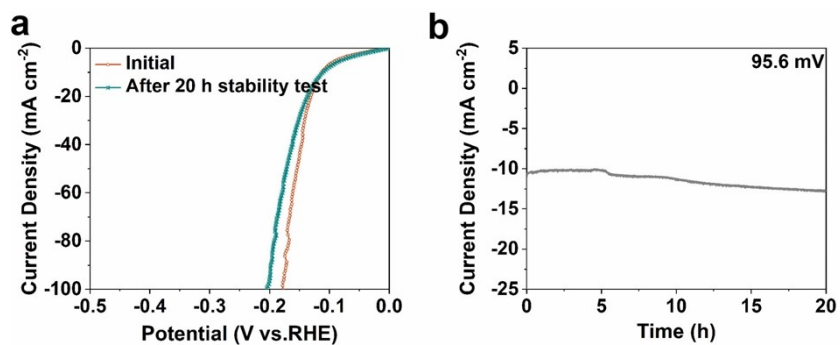

**Fig. S22.** a) LSV curves of 18L-3DP GC/Ni<sub>2</sub>CoP<sub>2</sub> before and after 20 h stability test for the HER. b) Chronopotentiometry plots of 18L-3DP GC/Ni<sub>2</sub>CoP<sub>2</sub> obtained at a constant potential of 0.0956 V for HER.

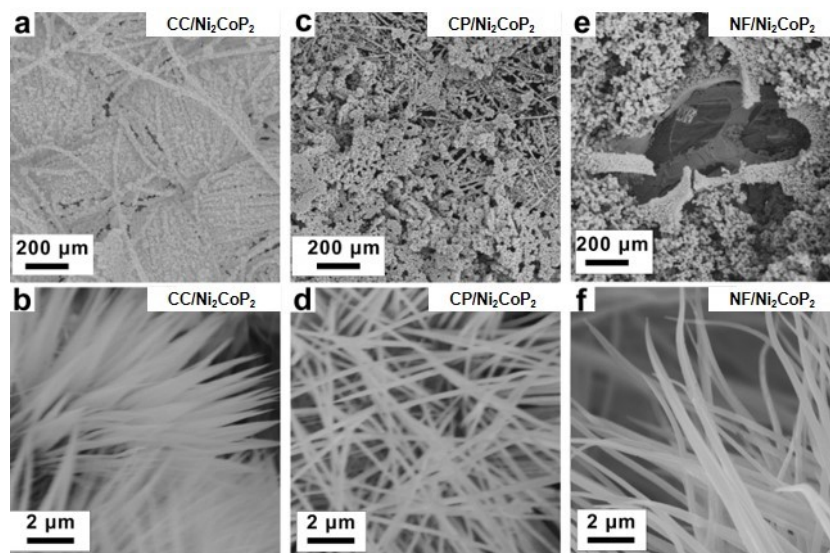

**Fig. S23.** The SEM images of Ni<sub>2</sub>CoP<sub>2</sub> on (a,b) CC, (c,d) CP, (e,f) NF.

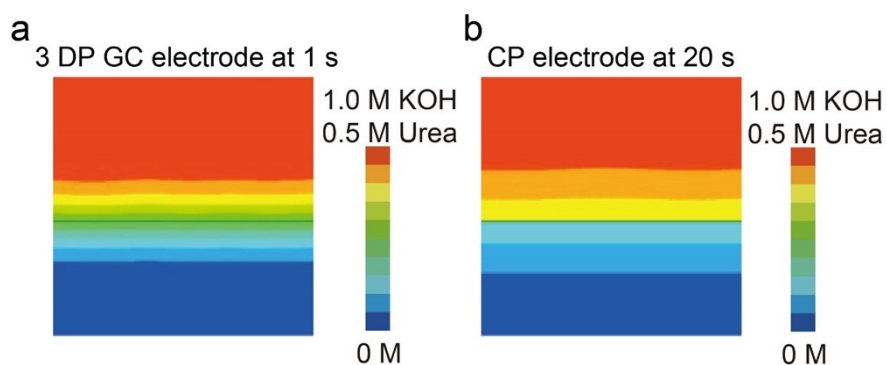

**Fig. S24.** Simulation of 1.0 M KOH + 0.5 M urea mass transfer under different 3D structured electrodes. a) 3DP GC electrode. b) CP electrode.

**Table S1.** The corresponding EIS parameters of the 6L-3DP GC/Ni<sub>2</sub>CoP<sub>2</sub>, 12L-3DP GC/Ni<sub>2</sub>CoP<sub>2</sub> and 18L-3DP GC/Ni<sub>2</sub>CoP<sub>2</sub> for UOR.

|                                      | 18L-3DP GC/Ni <sub>2</sub> CoP <sub>2</sub> | 12L-3DP GC/Ni <sub>2</sub> CoP <sub>2</sub> | 6L-3DP GC/Ni <sub>2</sub> CoP <sub>2</sub> |
|--------------------------------------|---------------------------------------------|---------------------------------------------|--------------------------------------------|
| R <sub>s</sub> (Ω cm <sup>2</sup> )  | 4.22                                        | 4.60                                        | 5.52                                       |
| R <sub>ct</sub> (Ω cm <sup>2</sup> ) | 0.24                                        | 0.52                                        | 0.59                                       |

**Table S2.** The corresponding EIS parameters of the 6L-3DP GC/Ni<sub>2</sub>CoP<sub>2</sub>, 12L-3DP GC/Ni<sub>2</sub>CoP<sub>2</sub> and 18L-3DP GC/Ni<sub>2</sub>CoP<sub>2</sub> for HER.

|                                      | 18L-3DP GC/Ni <sub>2</sub> CoP <sub>2</sub> | 12L-3DP GC/Ni <sub>2</sub> CoP <sub>2</sub> | 6L-3DP GC/Ni <sub>2</sub> CoP <sub>2</sub> |
|--------------------------------------|---------------------------------------------|---------------------------------------------|--------------------------------------------|
| R <sub>s</sub> (Ω cm <sup>2</sup> )  | 2.82                                        | 3.68                                        | 4.65                                       |
| R <sub>ct</sub> (Ω cm <sup>2</sup> ) | 0.42                                        | 0.57                                        | 0.69                                       |

**Table S3.** Comparison of UOR performance of 3DP GC/Ni<sub>2</sub>CoP<sub>2</sub> with Ni, Co-based electrocatalysts. (*j*: current density; E: potential)

| Catalysts                                          | <i>j</i> (mA cm <sup>-2</sup> ) | E (V)       | Reference                                                          |
|----------------------------------------------------|---------------------------------|-------------|--------------------------------------------------------------------|
| a-MoS <sub>2</sub> /CoS/Co <sub>0.85</sub> Se HNTs | 50                              | 1.38        | <i>Nanoscale</i> , 2020, <b>12</b> , 991                           |
| Ni <sub>2</sub> P/Fe <sub>2</sub> P/NF             | 10                              | 1.36        | <i>J. Colloid Interf. Sci.</i> , 2019, <b>541</b> , 279-286        |
| Co-Ni-S@NF                                         | 10                              | 1.31        | <i>J. Mater. Chem. A</i> , 2022, <b>10</b> , 24137                 |
| Co-V-NiS <sub>2</sub>                              | 10                              | 1.35        | <i>ACS Catal.</i> , 2022, <b>12</b> , 569-579                      |
| Co-NiMoO <sub>4</sub> -Ar                          | 10                              | 1.324       | <i>J. Mater. Chem. A</i> , 2022, <b>10</b> , 16825                 |
| Ni(OH)S/NF                                         | 10                              | 1.34        | <i>Appl. Catal. B Environ.</i> , 2022, <b>312</b> , 121389         |
| NC-FNCP                                            | 10                              | 1.37        | <i>Nano Res.</i> , 2022, <b>15</b> , 1916-1925                     |
| CoNi LDH                                           | 10                              | 1.32        | <i>ACS Appl. Mater. Interfaces</i> , 2022, <b>14</b> , 16222-16232 |
| Ni <sub>3</sub> S <sub>2</sub> /NF                 | 10                              | 1.34        | <i>ACS Appl. Mater. Interfaces</i> , 2021, <b>13</b> , 35709-35718 |
| <b>3DP GC/Ni<sub>2</sub>CoP<sub>2</sub></b>        | <b>10</b>                       | <b>1.31</b> | <b>This work</b>                                                   |

**Table S4** Comparison of HER performance of 3DP GC/Ni<sub>2</sub>CoP<sub>2</sub> with Ni, Co-based electrocatalysts. (*j*: current density;  $\eta$ : overpotential)

| Catalysts                                             | <i>j</i> (mA cm <sup>-2</sup> ) | $\eta$ (mV) | Reference                                                        |
|-------------------------------------------------------|---------------------------------|-------------|------------------------------------------------------------------|
| a-MoS <sub>2</sub> /CoS/Co <sub>0.85</sub> Se HNTs    | 10                              | 127         | <i>Nanoscale</i> , 2020, <b>12</b> , 991                         |
| Ni <sub>2</sub> P/Fe <sub>2</sub> P/NF                | 10                              | 115         | <i>J. Colloid Interf. Sci.</i> , 2019, <b>541</b> , 279-286      |
| Ni-Co-P HNBS                                          | 10                              | 107         | <i>Energy Environ. Sci.</i> , 2018, <b>11</b> , 872              |
| Fe-CoP HTPAs                                          | 10                              | 98          | <i>Small</i> , 2018, <b>14</b> , 1704233                         |
| NiCoP/NF                                              | 10                              | 95          | <i>J Mater. Chem. A</i> , 2023, <b>11</b> , 1256                 |
| NiCoP-90                                              | 10                              | 93          | <i>Adv. Energy Mater.</i> , 2023, <b>12</b> , 2300499            |
| Ni <sub>0.2</sub> S/Cu <sub>5</sub> FeS <sub>4</sub>  | 10                              | 140         | <i>J. Colloid Interf. Sci.</i> , 2020, <b>578</b> , 668-676      |
| r-NiS/h-NiS                                           | 10                              | 101         | <i>J. Colloid Interf. Sci.</i> , 2023, <b>633</b> , 640-648      |
| Ni ND <sub>s45</sub>                                  | 10                              | 204         | <i>Mol. Catal.</i> , 2021, <b>516</b> , 112006                   |
| Co <sub>0.9</sub> Ni <sub>0.1</sub> Se with vacancies | 10                              | 185.7       | <i>Mol. Catal.</i> , 2022, <b>525</b> , 112339                   |
| Ni-SA/NC                                              | 10                              | 102         | <i>Angew. Chem. Int. Ed.</i> , 2020, <b>59</b> , 22743-22748     |
| NiCo <sub>2</sub> -P                                  | 10                              | 183         | <i>Adv. Mater.</i> , 2020, <b>33</b> , 2003846                   |
| HC NiCo/C                                             | 10                              | 99          | <i>ACS Appl. Mater. Interfaces</i> , 2021, <b>13</b> , 9932-9941 |
| NiCo DASs/N-C                                         | 10                              | 189         | <i>Adv. Funct. Mater.</i> , 2023, <b>33</b> , 2210867            |
| NiCoO-NiCo/C                                          | 10                              | 123         | <i>Appl. Catal. B Environ.</i> , 2021, <b>292</b> , 120170       |
| 3DP GC/Ni <sub>2</sub> CoP <sub>2</sub>               | 10                              | 95.6        | This work                                                        |

**Video S1.** Electrolyte transmission behaviour of 3DP GC electrode.

**Video S2.** Electrolyte transmission behaviour of CP electrode.
